# Supplementary material for: Nrf2 Inhibits Periodontal Ligament Stem Cell Apoptosis under Excessive Oxidative Stress
Source: Int J Mol Sci. 2017 May 17;18(5):1076. doi: 10.3390/ijms18051076 (PMC5454985; doi:10.3390/ijms18051076)
Supplement: Supplementary file 1 [file ijms-18-01076-s001.pdf]

# Nrf2 Inhibits Periodontal Ligament Stem Cell Apoptosis under Excessive Oxidative Stress

Yanli Liu, Hongxu Yang, Yi Wen, Bingyi Li, Yinhua Zhao, Jing Xing, Min Zhang and Yongjin Chen

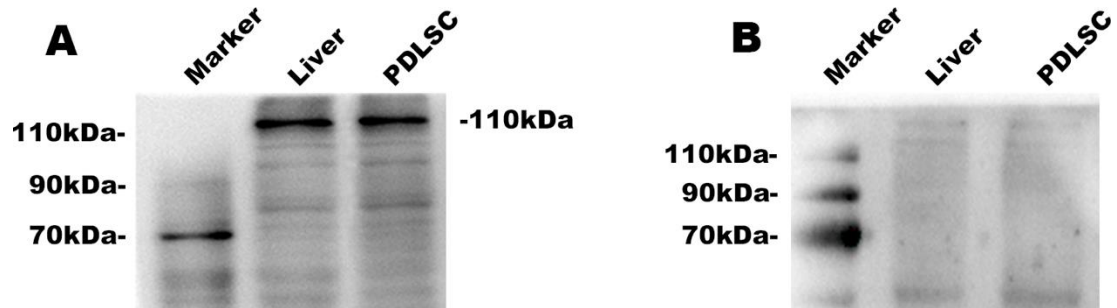

**Figure S1.** Nrf2 positive and negative control Western blot. (A) The positive control of Nrf2 expression assayed by western blot in liver tissue and PDLSCs; (B) The negative control of Nrf2 expression assayed by western blot without secondary antibody in liver tissue and PDLSCs.
